# Supplementary material
Source: PubMed Central journal article supplement (PMC5060010)
Supplement: NIHMS481929-supplement-1_si_002.pdf [file NIHMS481929-supplement-1_si_002.pdf]

## Supplemental methods

**Immunocytochemistry:** Two-color immunofluorescence was employed to analyze co-expression and internalization of mu- and delta-opioid receptors modified from a protocol previously described<sup>1</sup>. Briefly, HEK-293 cells coexpressing HA-delta and FL-mu were incubated with goat anti-HA (Abcam, Cat #ab9134) antibody and rabbit anti-FLAG (Abcam, Cat #1162) antibody at a final working concentration of 1:100 for 60 min at 4°C. After rinsing thrice with 50 mM PBS (pH 7.2), cells were incubated with or without ligands for 30 mins at 37°C to identify ligands that promote internalization. In antagonism experiments the delta antagonist, NTI, was incubated with cells 10-min prior to the addition of agonists. The cells were then rinsed again and were fixed with 4% formaldehyde for 10 min at room temperature. Then cells were washed (3 x 15 min) with PBS and incubated at room temperature with the mixture of anti-goat NL-493 (Cat # NL003; R&D Systems, Inc.) and anti-rabbit NL-557 (Cat # NL004; R&D Systems, Inc.) fluorescent secondary antibodies (1:200 final dilutions). Cells were again rinsed with PBS (3 x 15 min) and mounted under coverslips with anti-fade mounting media iBright Plus (Cat # SF40000-10; Neuromics, Inc.) containing DAPI. Olympus FluoView1000 confocal microscope was used for image collection.

**Cells.** Human embryonic kidney cells (HEK-293) stably expressing single opioid receptors (human  $\mu$ ,  $\kappa$  and mouse  $\delta$ ) were generated. HEK-293 cells co-expressing human opioid receptors in pairs were procured from Dr. Jennifer Whistler (University of California, San Francisco). Their construction and

characterization has been described previously <sup>1</sup>. Briefly, HEK-293 cells were cotransfected with HA- $\mu$  and FLAG- $\delta$  ( $\mu$ - $\delta$ ), HA- $\delta$  and FLAG- $\kappa$  ( $\kappa$ - $\delta$ ), HA- $\mu$  and FLAG- $\kappa$  ( $\mu$ - $\kappa$ ) to make the different stable coexpression cell lines. The stably expressing cells were checked for the expression of  $\mu$ - $\delta$  and  $\kappa$ - $\delta$  opioid receptor heteromers using co-immunoprecipitation. All the single and dual stable transfected cell lines were grown at 37°C and 10% CO<sub>2</sub> in Dulbecco's modified medium (GIBCO) supplemented with 10% FBS and 1% Penicillin-streptomycin antibiotic solution. G418 alone was used for selecting cells expressing opioid receptors singly, while both G418 and Zeocin were used to select for dual coexpression cell lines.

**Intracellular Ca<sup>2+</sup> release assay.** HEK-293 cells stably expressing opioid receptors obtained from Dr. Jennifer Whistler <sup>2</sup> were transiently transfected with a chimeric G $\alpha$ -protein <sup>3</sup>,  $\Delta 6$ -G<sub>qi4-myr</sub> at a concentration of 200 ng/20,000 cells using Lipofectamine 2000 (Invitrogen, Carlsbad CA). The DNA for the chimeric G-protein was the only DNA that was transiently transfected. The cell culture and calcium flux protocol was utilized as described previously <sup>4</sup>. Cells were grown to a confluency of approximately 2 million cells in a petridish. The cells were then counted and DNA for the chimeric G-protein was added to a ratio of 200 ng/20,000 cells. Lipofectamine 2000 at a ratio of 1:2 wt/vol (DNA:Lipofectamine) was used for the transfection. The cells were then seeded 24 hours later into half area black 96 well plates (Corning) at 20,000 cells per well. The FLIPR calcium kit (Molecular devices) was used for the assay. Cells were incubated with a Ca<sup>2+</sup> ion chelating dye from the kit, 48 hours after transfection, and incubated for an

hour. The plates were then assayed in a Flexstation-III apparatus (Molecular Devices) using a range of concentrations of the opioid ligand. The response was measured as Relative Fluorescence Units (RFUs) and the time of the response was measured in seconds. A response window of 33 seconds after ligand addition was used to measure the response before calcium ion reuptake mechanisms caused a drop in fluorescence.  $\Delta$ RFU was computed for each concentration which was then plotted as a concentration response curve using non-linear regression. To incorporate well-to-well variability, four well replications were performed for each concentration of the ligand. Importantly, each ligand was tested in at least three independent replications where, each replicate experiment consists of cells transiently transfected with the chimeric G-protein on a separate day thus ensuring true biological replication. The representative curves,  $EC_{50}$  and  $RFU_{peak}$  values are all thus calculated from the four internal/dependent and three independent replications. Thus any variability due to transfection is contained in the error bars and has been accounted for.

## References

1. Yekkirala, A. S., Kalyuzhny, A. E. & Portoghese, P. S. (2009) Standard Opioid Agonists Activate Heteromeric Opioid Receptors: Evidence for Morphine and [d-Ala<sup>2</sup>-MePhe<sup>4</sup>-Glyol<sup>5</sup>] Enkephalin as Selective  $\mu$ - $\delta$  Agonists. *ACS Chem. Neurosci.*, **1**, 146 – 154.
2. Waldhoer, M.; Fong, J.; Jones, R. M.; Lunzer, M. M.; Sharma, S. K.; Kostenis, E.; Portoghese, P. S.; Whistler, J. L., A heterodimer-selective agonist shows in vivo relevance of G protein-coupled receptor dimers. *Proc. Natl. Acad. Sci. USA* **2005**, *102* (25), 9050-9055.
3. Kostenis, E., Is Galpha16 the optimal tool for fishing ligands of orphan G-protein-coupled receptors? *Trends Pharmacol. Sci.* **2001**, *22* (11), 560-564.
4. Yekkirala, A. S., Lunzer, M. M., McCurdy, C. R., Powers, M. P., Roerig, S. C. & Portoghese, P. S. (2011) N-Naphthoyl- $\beta$ -naltrexamine (NNTA), a selective activator of  $\mu/\kappa$  opioid receptor heteromers. *Proc. Natl. Acad. Sci. USA*. DOI: 10.1073/pnas.1016277108
